# Supplementary figures and images for: Thermodynamic stability and relaxation studies of small, triaza-macrocyclic Mn(ii) chelates
Source: Royal Society of Chemistry journal article supplement (doi:10.1039/c2dt32496b), 2013-01-01

Electronic Supplementary Information

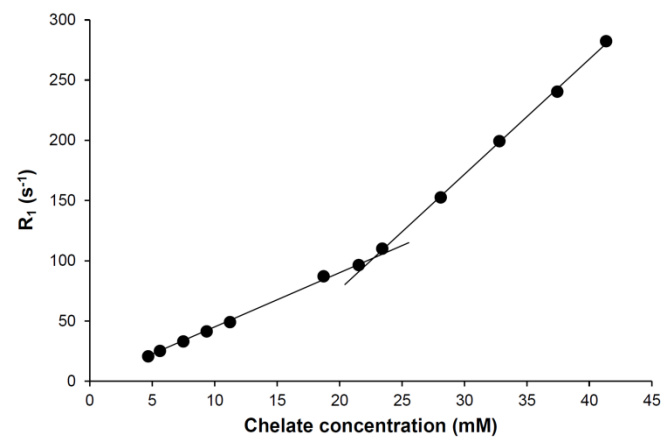

Fig. S1

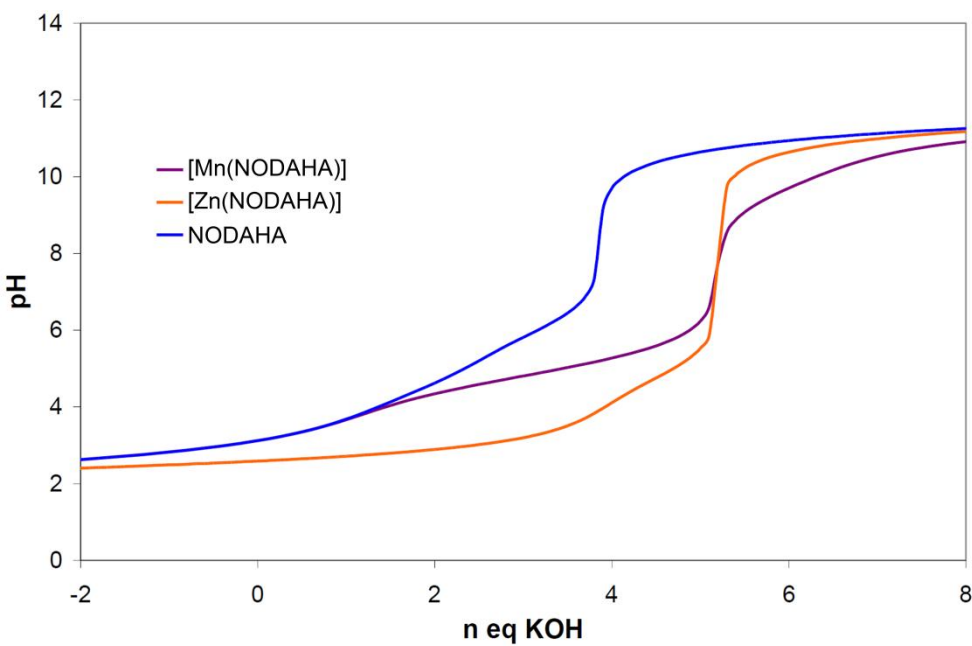

Fig. S2

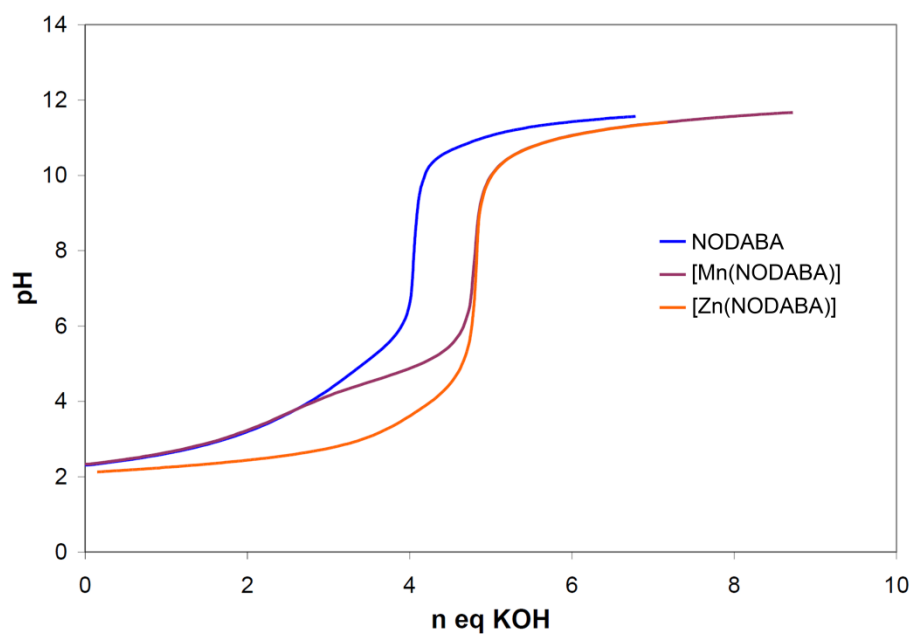

Fig. S3

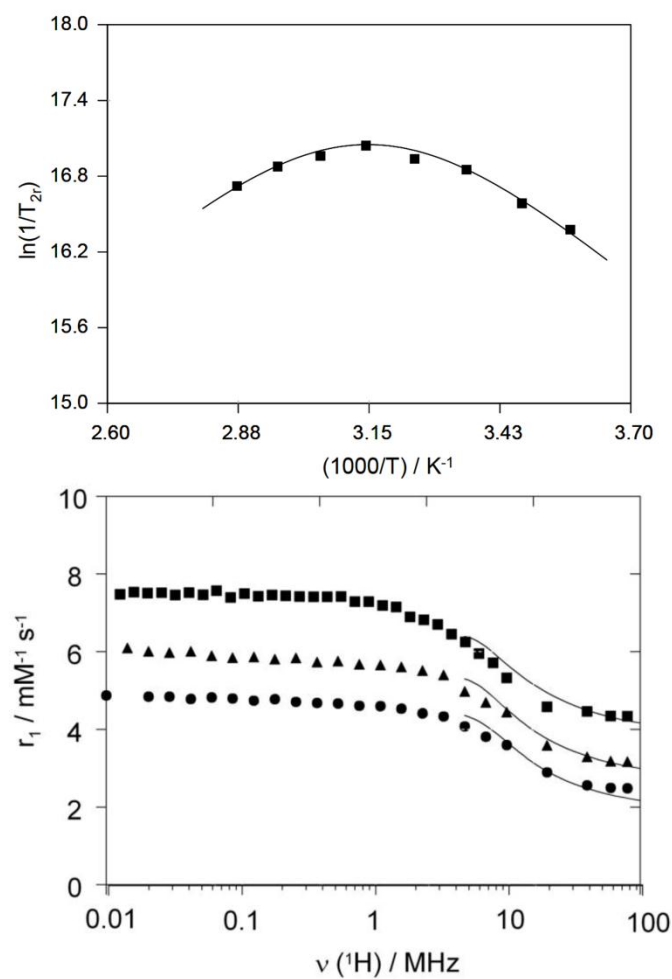

Fig. S4

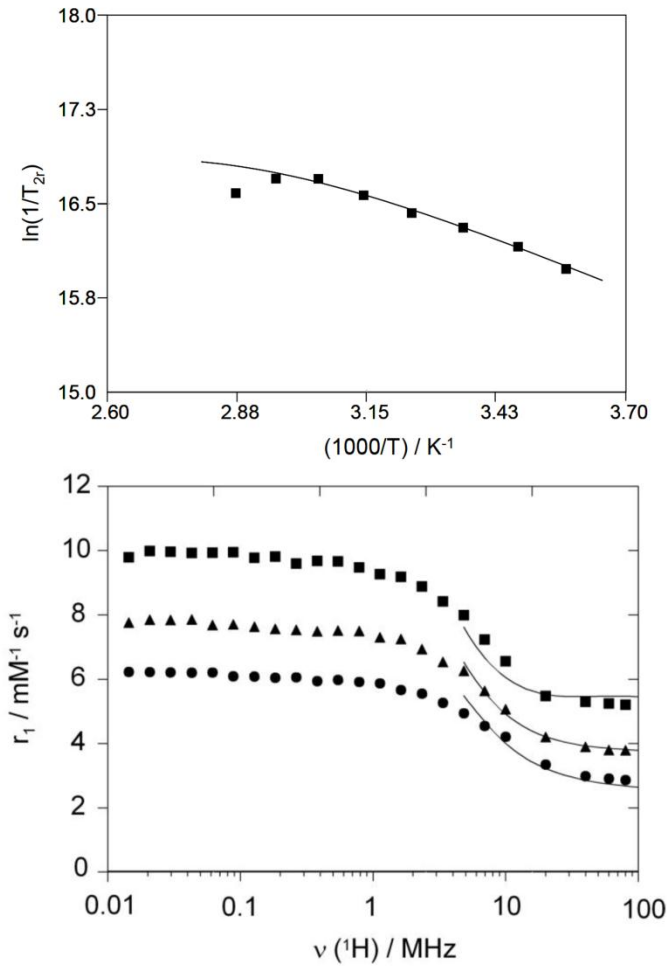

Fig. S5

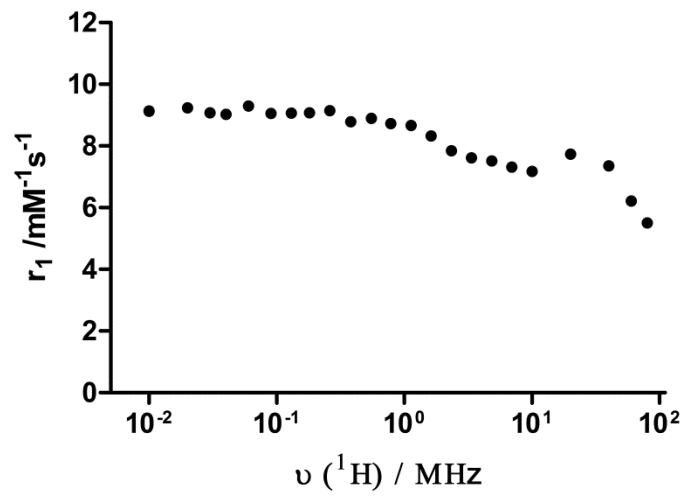

Fig. S6

Supplement: c2dt32496b.pdf [file c2dt32496b.pdf]
